# Supplementary material for: Fabrication of Activated Carbon Decorated with ZnO Nanorod-Based Electrodes for Desalination of Brackish Water Using Capacitive Deionization Technology
Source: MDPI journal article supplement (doi:10.3390/ijms24021409), 2023-01-11
Supplement: s1 [file s1]

## Supporting Information

# Fabrication of activated carbon decorated with ZnO nanorods-based electrodes for desalination of brackish water using capacitive deionization technology.

Jhonatan Martinez, Martín Colán, Ronald Castellón, Pierre Ramos, Robert Paria, Luis Sánchez and Juan M. Rodríguez\*

Center for the Development of Advanced Materials and Nanotechnology, Universidad Nacional de Ingeniería, Av. Túpac Amaru 210, Lima 15333, Peru

\* Correspondence: jrodriguez@uni.edu.pe

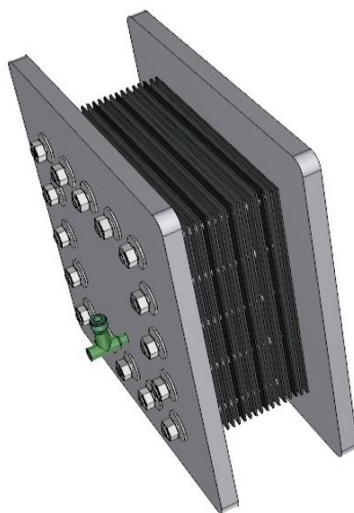

Figure S1. CDI cell fabricated with nine pairs of electrodes

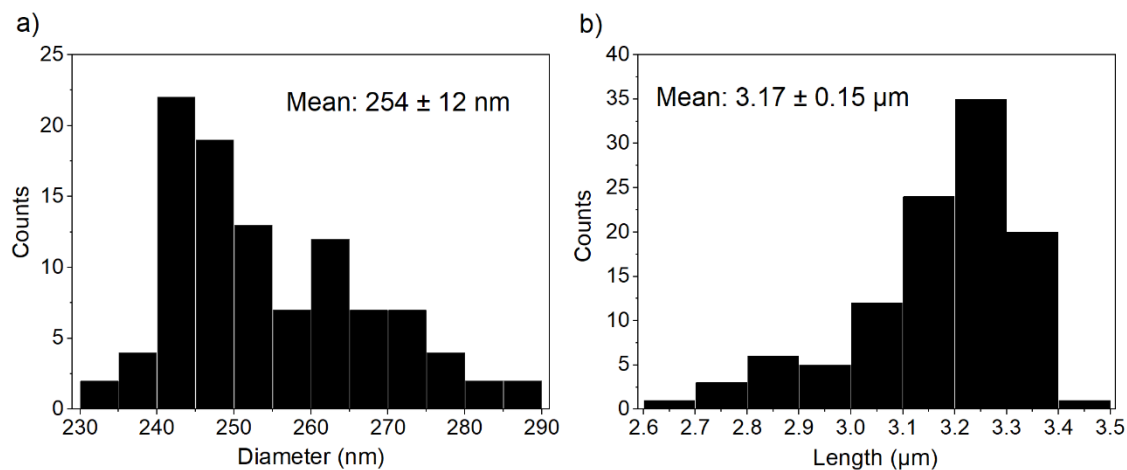

Figure S2. Histograms showing the distribution of measured a) Diameter and b) Length of ZnO nanostructures.

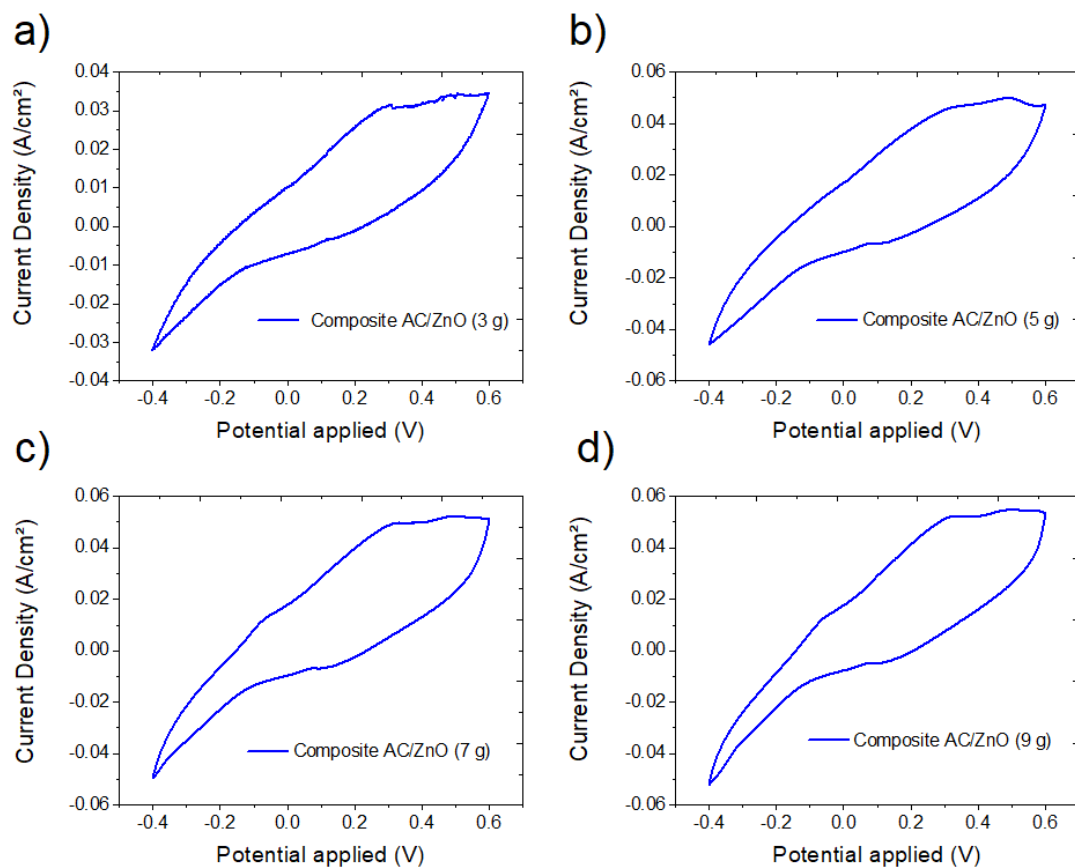

Figure S3. Cyclic voltammograms corresponding to the CA/ZnO composites for different masses of ZnO. a) 3 g of ZnO powder, b) 5 g of ZnO powder, c) 7 g of ZnO powder and d) 9 g of ZnO powder.

Table S1. BET Specific Surface area: Activated carbon and Activated carbon/ZnO (9 g)

| Specimen                      | BET<br>Specific<br>surface area<br>(m <sup>2</sup> /g) | Specific surface<br>area<br>mesopores<br>(m <sup>2</sup> /g) | Specific surface<br>area<br>micropores<br>(m <sup>2</sup> /g) | Pore size<br>(nm) |
|-------------------------------|--------------------------------------------------------|--------------------------------------------------------------|---------------------------------------------------------------|-------------------|
| Activated Carbon              | 33 ± 1                                                 | 33 ± 1                                                       | Without<br>presence                                           | 12,5              |
| Activated<br>Carbon/ZnO (9 g) | 182 ± 1                                                | 124 ± 1                                                      | 58 ± 1                                                        | 8,1               |
